# Supplementary material for: Randomized control trial of a childhood obesity prevention family-based program: “Abriendo Caminos” and effects on BMI
Source: Frontiers journal article supplement (doi:10.3389/fped.2023.1137825), 2023-06-07
Supplement: Table_1.pdf [file Table_1.pdf]

## Supplementary Material

### Randomized Control Trial of a Childhood Obesity Prevention Family-Based Program: “Abriendo Caminos” and Effects on BMI

Margarita Teran-Garcia<sup>1</sup>, Amber J. Hammons<sup>2</sup>, Norma Olvera<sup>3</sup>, Kimberly Greder<sup>4</sup>, Maria Plaza-Delrestre<sup>5</sup>, Flavia Cristina Drumond Andrade<sup>6</sup>, Barbara Fiese<sup>7</sup>, Angela Wiley<sup>8</sup>, and the Abriendo Caminos Research Team

\* **Correspondence:** Margarita Teran-Garcia, teranmd@illinois.edu

#### 1 Supplementary Tables

**Table S1a.** Estimated parameters from repeated mixed-effects regressions on continuous BMI z-scores outcome measures. Analyses of disaggregated data for boys and girls, controlled for age.

| <i>Fixed effects</i>          | Boys     |                |                 | Girls    |                 |                 |
|-------------------------------|----------|----------------|-----------------|----------|-----------------|-----------------|
|                               | Estimate | 95% CI         | <i>P</i> -value | Estimate | 95% CI          | <i>P</i> -value |
| Intervention (ref=control)    | 0.117    | (-0.188,0.423) | 0.452           | -0.197   | (-0.46,0.065)   | 0.141           |
| Time (ref=T0)                 |          |                |                 |          |                 |                 |
| T1                            | 0.001    | (-0.048,0.05)  | 0.965           | 0.027    | (-0.006,0.061)  | 0.113           |
| T2                            | -0.003   | (-0.087,0.08)  | 0.943           | -0.004   | (-0.074,0.065)  | 0.904           |
| Group x time                  |          |                |                 |          |                 |                 |
| Intervention x T1             | -0.017   | (-0.083,0.048) | 0.604           | -0.077   | (-0.133,-0.021) | 0.007           |
| Intervention x T2             | -0.014   | (-0.118,0.091) | 0.798           | -0.002   | (-0.098,0.094)  | 0.965           |
| Age (ref=12+)                 |          |                |                 |          |                 |                 |
| Younger children (6-11 years) | -0.081   | (-0.439,0.277) | 0.658           | -0.306   | (-0.576,-0.037) | 0.026           |
| Site (ref=Illinois)           |          |                |                 |          |                 |                 |
| California                    | -0.408   | (-0.838,0.022) | 0.063           | -0.263   | (-0.662,0.136)  | 0.197           |
| Iowa                          | 0.307    | (-0.117,0.731) | 0.156           | 0.166    | (-0.227,0.558)  | 0.407           |
| Texas                         | 0.231    | (-0.196,0.658) | 0.289           | -0.025   | (-0.453,0.404)  | 0.909           |
| Puerto Rico                   | -0.517   | (-1.101,0.067) | 0.083           | -0.828   | (-1.271,-0.386) | 0.000           |
| Intercept                     | 1.195    | (0.773,1.617)  | 0.000           | 1.448    | (1.015,1.881)   | 0.000           |
| Random effects                |          |                |                 |          |                 |                 |
| Intercept                     | 1.0666   | (0.869,1.309)  |                 | 0.9746   | (0.821,1.157)   |                 |
| Residual                      | 0.0227   | (0.017,0.03)   |                 | 0.0252   | (0.018,0.035)   |                 |
| Model fit                     |          | AIC            | BIC             |          | AIC             | BIC             |
|                               |          | 504.96         | 556.65          |          | 632.10          | 686.70          |

AIC = Akaike information criterion, BIC = Bayesian information criterion

**Table S1b.** Estimated parameters from repeated mixed-effects regressions on continuous BMI z-scores outcome measures. Analyses of disaggregated data for young or old children controlled for sex.

| <i>Fixed effects</i>       | Younger  |                |                | Older    |                |                |
|----------------------------|----------|----------------|----------------|----------|----------------|----------------|
|                            | Estimate | 95% CI         | <i>p-value</i> | Estimate | 95% CI         | <i>p-value</i> |
| Intervention (ref=control) | 0.015    | (-0.225,0.256) | 0.900          | -0.328   | (-0.685,0.029) | 0.072          |
| Time (ref=T0)              |          |                |                |          |                |                |
| T1                         | 0.029    | (-0.007,0.065) | 0.113          | -0.021   | (-0.066,0.024) | 0.358          |
| T2                         | 0.002    | (-0.058,0.062) | 0.958          | -0.018   | (-0.137,0.101) | 0.763          |
| Group x time               |          |                |                |          |                |                |
| Intervention x T1          |          | (-0.124,-0.07) | 0.003          | 0.052    | (-0.043,0.146) | 0.284          |
| Intervention x T2          | -0.01    | (-0.085,0.072) | 0.874          | -0.014   | (-0.177,0.149) | 0.870          |
| Sex (ref=Girls )           |          |                |                |          |                |                |
| Boys                       | 0.25     | (0.027,0.482)  | 0.028          | -0.002   | (-0.377,0.372) | 0.990          |
| Site (ref=Illinois)        |          |                |                |          |                |                |
| California                 | -0.28    | (-0.61,0.055)  | 0.102          | -0.353   | (-0.949,0.243) | 0.246          |
| Iowa                       | 0.23     | (-0.09,0.541)  | 0.161          | 0.204    | (-0.442,0.85)  | 0.536          |
| Texas                      | 0.03     | (-0.333,0.384) | 0.888          | 0.496    | (-0.053,1.046) | 0.077          |
| Puerto Rico                | -0.72    | (-1.137,-0.3)  | 0.001          | -0.525   | (-1.22,0.17)   | 0.139          |
| Intercept                  | 0.98     | (0.679,1.283)  | 0.000          | 1.369    | (0.809,1.928)  | 0.000          |
| Random effects             |          | Variance       |                |          | Variance       |                |
| Intercept                  | 1.0620   | (0.916,1.231)  |                | 0.8881   | (0.684,1.153)  |                |
| Residual                   | 0.0245   | (0.019,0.032)  |                | 0.0217   | (0.014,0.034)  |                |
| Model fit                  |          | AIC            | BIC            |          | AIC            | BIC            |
|                            |          | 848.49         | 907.45         |          | 285.35         | 328.09         |

AIC = Akaike information criterion, BIC = Bayesian information criterion

**Table S1c.** Estimated parameters from repeated mixed-effects regressions on continuous BMI z-scores outcome measures restricted to participants whose mothers are from Mexico.

| <i>Fixed effects</i>       | Mexican mothers |                  |                |
|----------------------------|-----------------|------------------|----------------|
|                            | Estimate        | 95% CI           | <i>p-value</i> |
| Intervention (ref=control) | 0.024           | (-0.212, 0.26)   | 0.841          |
| Time (ref=T0)              |                 |                  |                |
| T1                         | 0.027           | (-0.007, 0.061)  | 0.114          |
| T2                         | -0.010          | (-0.069, 0.048)  | 0.727          |
| Group x time               |                 |                  |                |
| Intervention x T1          | -0.049          | (-0.094, -0.004) | 0.034          |
| Intervention x T2          | 0.004           | (-0.075, 0.082)  | 0.929          |
| Sex (ref=Girls)            |                 |                  |                |
| Boys                       | 0.083           | (-0.146, 0.313)  | 0.478          |
| Age (ref=Older)            |                 |                  |                |
| Young                      | -0.172          | (-0.422, 0.078)  | 0.177          |
| Site (ref=Illinois)        |                 |                  |                |
| California                 | -0.203          | (-0.516, 0.109)  | 0.203          |
| Iowa                       | 0.263           | (-0.049, 0.575)  | 0.099          |
| Texas                      | 0.154           | (-0.193, 0.502)  | 0.384          |
| Intercept                  | 1.173           | (0.82, 1.527)    | 0.000          |
| Random effects             |                 | Variance         |                |
| Intercept                  | 0.9873          | (0.838, 1.163)   |                |
| Residual                   | 0.0207          | (0.017, 0.026)   |                |
| Model fit                  |                 | AIC              | BIC            |
|                            |                 | 720.97           | 779.03         |

AIC = Akaike information criterion, BIC = Bayesian information criterion

**Table S2. Changes in weight status (wt\_status) categories according to the intervention**

| Intervention |         | T1_wtstatus |            |            |           |                |
|--------------|---------|-------------|------------|------------|-----------|----------------|
|              |         | Normal      | Obese      | Overwt     | Underwt   | Total          |
| T0_wtstatus  | Normal  | 70<br>97.2  | 0<br>0.0   | 2<br>2.8   | 0<br>0.0  | 72<br>100.0 %  |
|              | Obese   | 0<br>0.0    | 49<br>89.1 | 6<br>10.9  | 0<br>0.0  | 55<br>100.0 %  |
|              | Overwt  | 4<br>14.8   | 2<br>7.4   | 21<br>77.8 | 0<br>0.0  | 27<br>100.0 %  |
|              | Underwt | 1<br>25.0   | 0<br>0.0   | 0<br>0.0   | 3<br>75.0 | 4<br>100.0 %   |
|              | Total   | 75<br>47.5  | 51<br>32.3 | 29<br>18.4 | 3<br>1.9  | 158<br>100.0 % |

| Control     |         | T1_wtstatus |            |             |                |
|-------------|---------|-------------|------------|-------------|----------------|
|             |         | Normal      | Obese      | Overwt      | Total          |
| T0_wtstatus | Normal  | 49<br>97.2  | 0<br>0.0   | 2<br>3.9    | 51<br>100.0 %  |
|             | Obese   | 0<br>0.0    | 41<br>95.4 | 2<br>4.7    | 43<br>100.0 %  |
|             | Overwt  | 0<br>0.0    | 0<br>0.0   | 23<br>100.0 | 23<br>100.0 %  |
|             | Underwt | 1<br>100.0  | 0<br>0.0   | 0<br>0.0    | 1<br>100.0 %   |
|             | Total   | 50<br>42.4  | 41<br>34.8 | 27<br>22.9  | 118<br>100.0 % |

Most children remained in the same categories between T0 and T1 in both *Abriendo Caminos* intervention and control groups. However, weight loss was more common than weight gain in the intervention group. In particular, among those in the intervention group who were obese, 11% became overweight, and among those who were overweight, 15% became normal weight. In the control group, only 5% of those obese became overweight, and no one who was overweight became normal.
